# Supplementary material for: SARS-CoV-2 infects and replicates in photoreceptor and retinal ganglion cells of human retinal organoids
Source: bioRxiv or medRxiv preprint supplement (doi:10.1101/2021.10.09.463766), 2021-10-12

**A**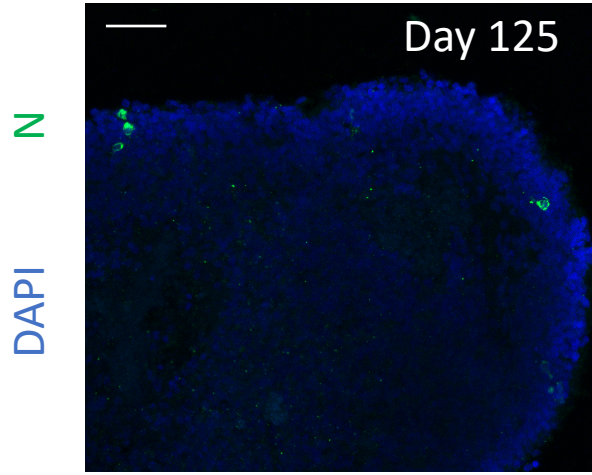**B**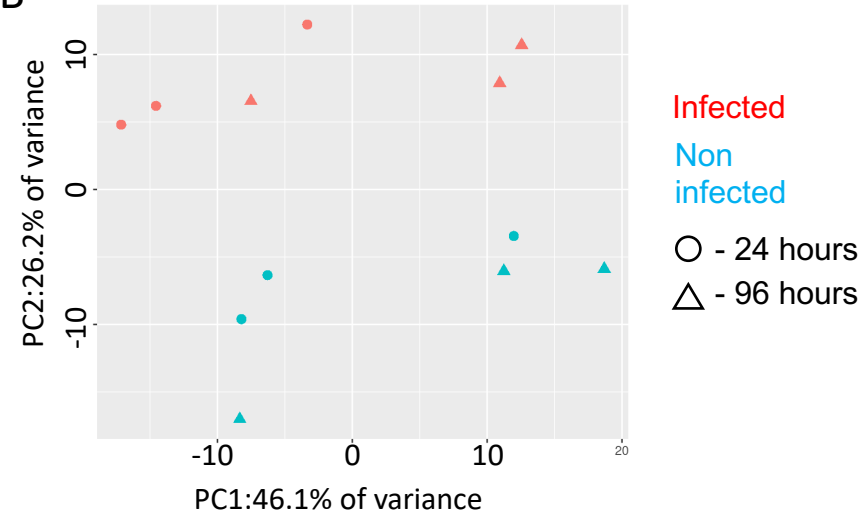**C**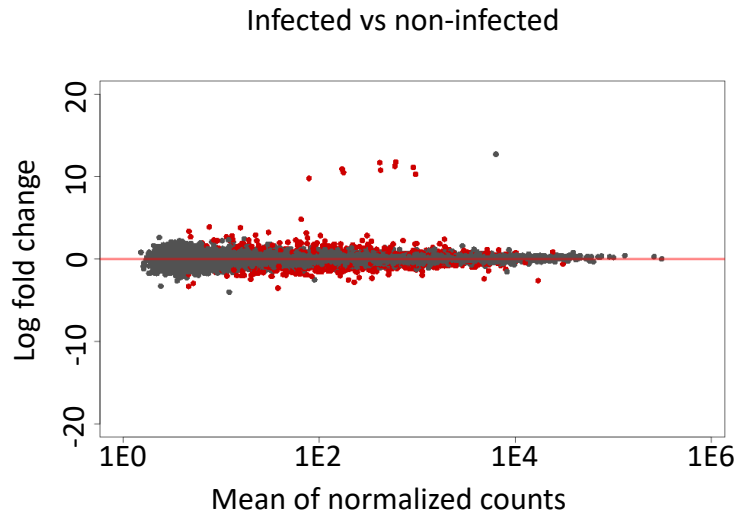**D**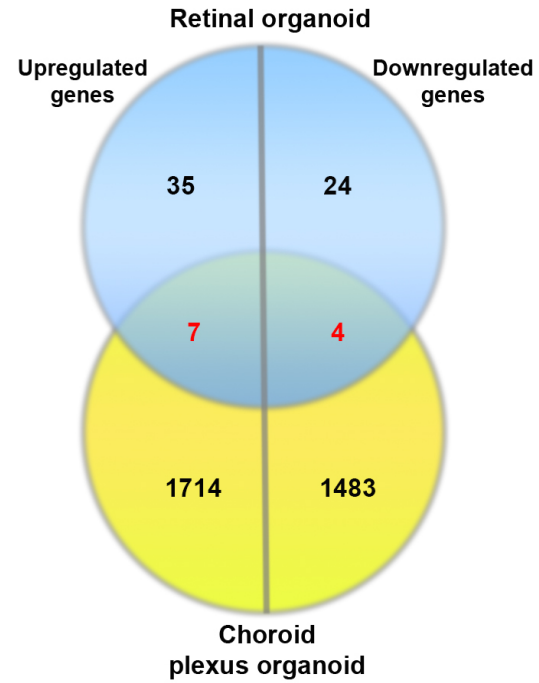

Supplement: Supplementary file [file media-2.pdf]
